# Supplementary figures and images for: Successive Inoculations of Pigs with Porcine Reproductive and Respiratory Syndrome Virus 1 (PRRSV-1) and Swine H1N2 Influenza Virus Suggest a Mutual Interference between the Two Viral Infections
Source: MDPI journal article supplement (doi:10.3390/v13112169), 2021-10-27

**(a) anti-PRRSV IgG (serum)**

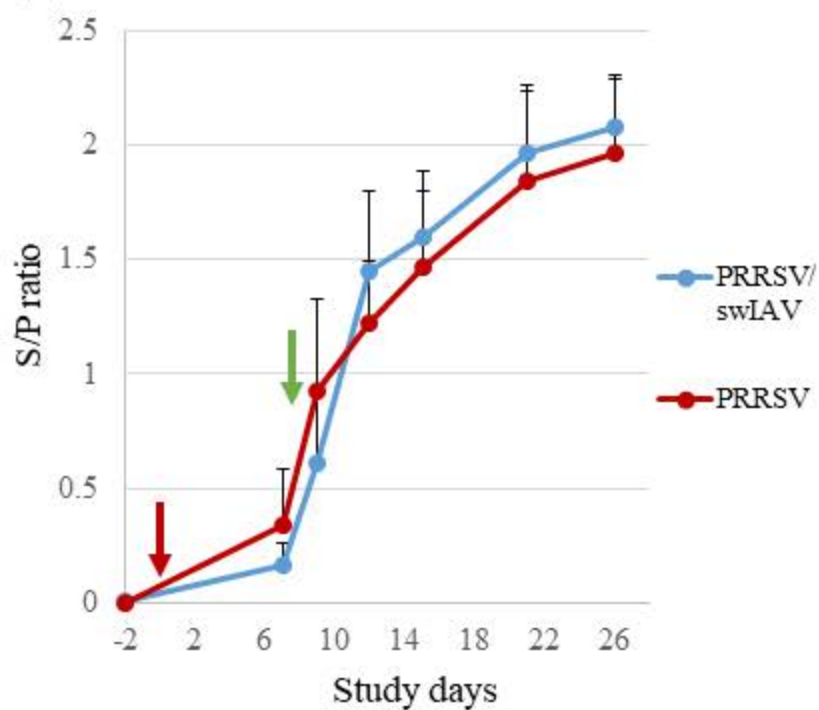

**(b) anti-PRRSV IgG (BALF)**

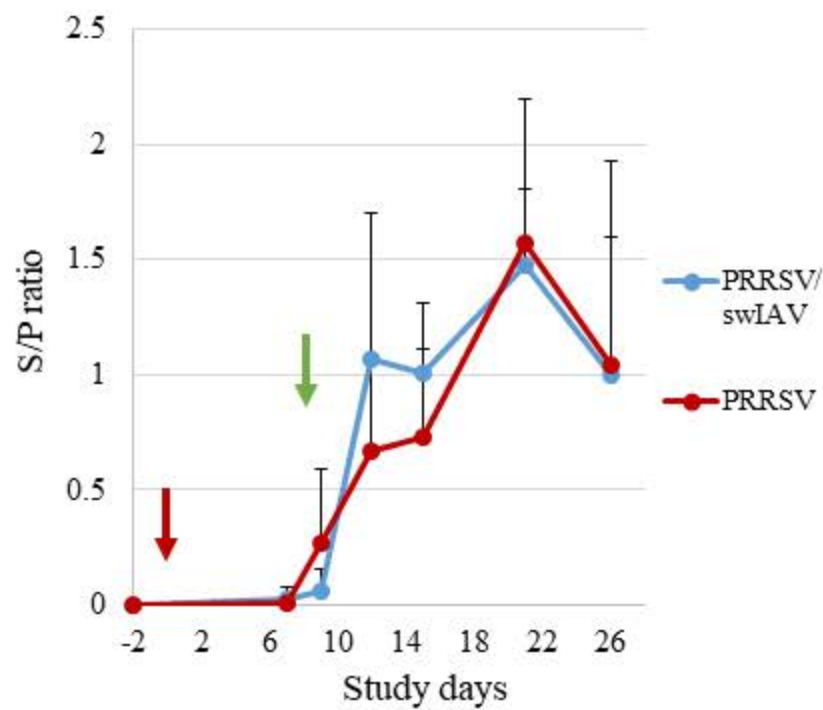

**(c) Anti-PRRSV IgA (BALF)**

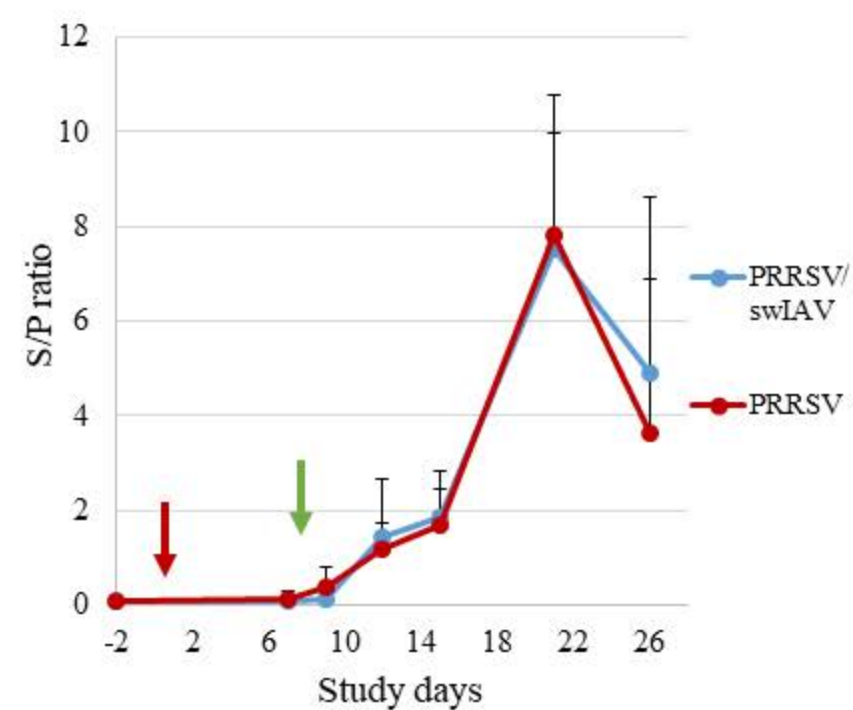

Supplement: s1 [file s1]

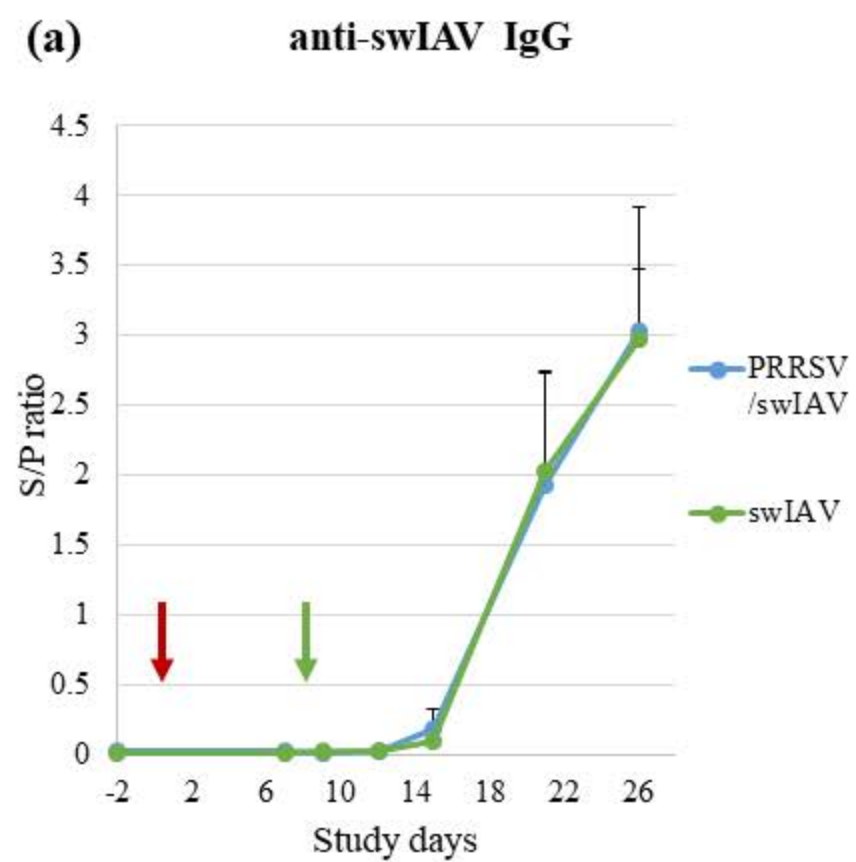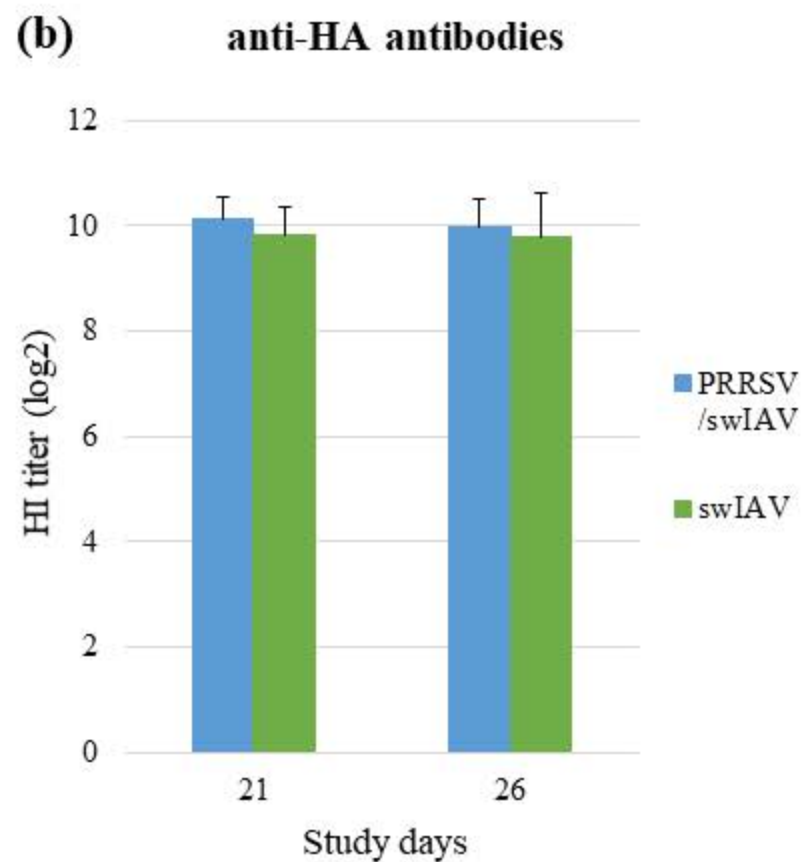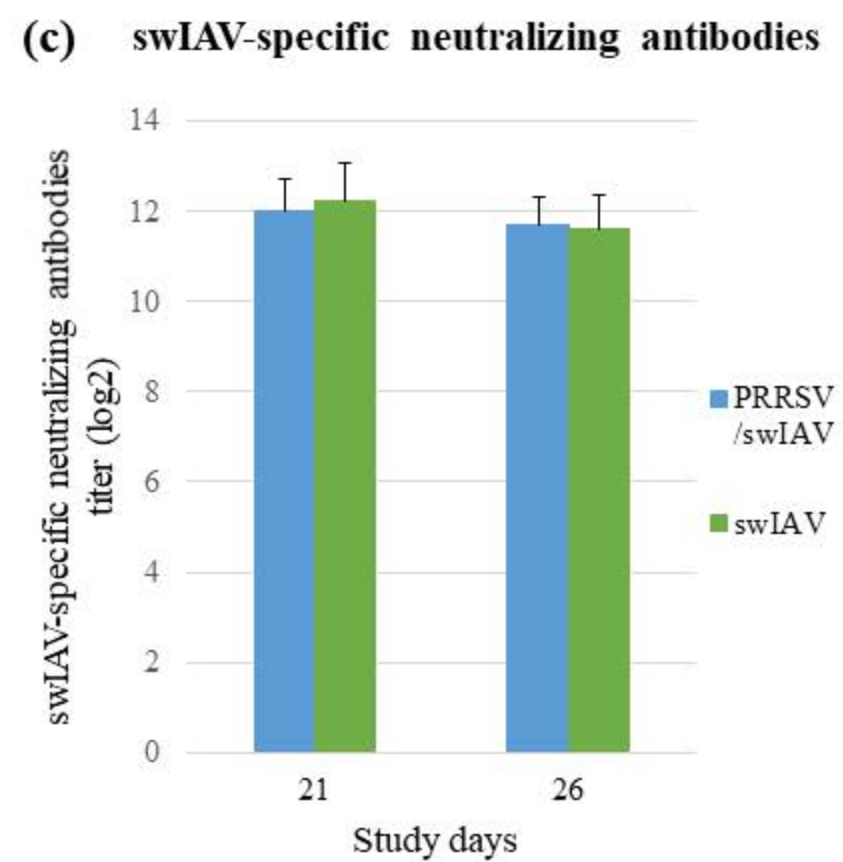

Supplement: s1 [file s1]
